# Supplementary material
Source: HighWire-hosted journal article supplement (http://thorax.bmjjournals.com/highwire/filestream/174457/field_highwire_adjunct_files/2/60132figS2.pdf)

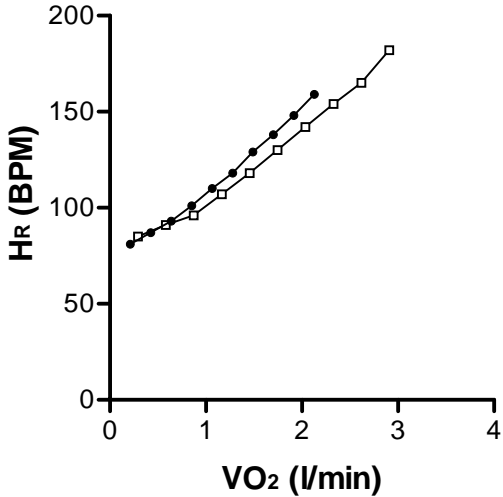

Supplement: 60132figS2.pdf [file 60132figS2.pdf]
